# Supplementary material for: Detection of histone H3 K27M mutation and post-translational modifications in pediatric diffuse midline glioma via tissue immunohistochemistry informs diagnosis and clinical outcomes
Source: PubMed Central journal article supplement (PMC6324678; doi:10.18632/oncotarget.26430), 2018-12-14
Supplement: oncotarget-09-37112-s001.pdf [file oncotarget-09-37112-s001.pdf]

## Detection of histone H3 K27M mutation and post-translational modifications in pediatric diffuse midline glioma via tissue immunohistochemistry informs diagnosis and clinical outcomes

### SUPPLEMENTARY MATERIALS

A

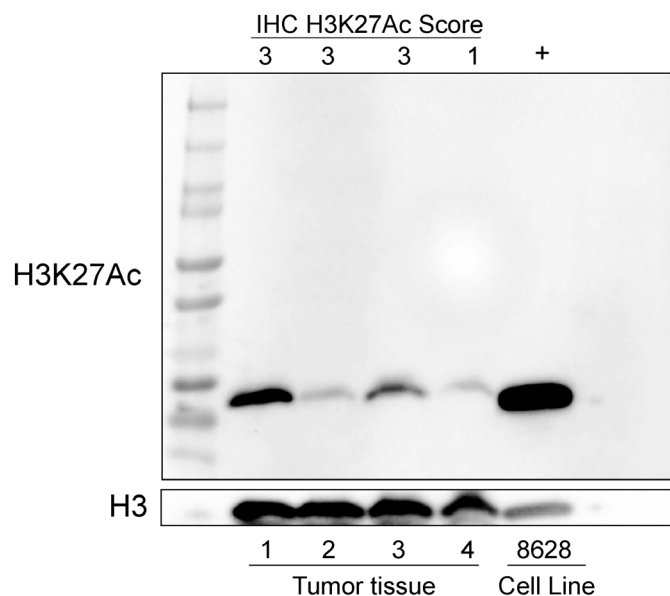

B

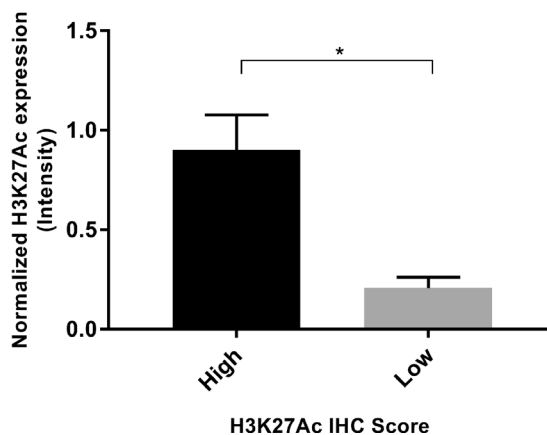

**Supplementary Figure 1: Tissue H3K27Ac levels correlates with H3K27Ac IHC staining results.** To validate tissue IHC results, western blot analysis of total protein extracted from fresh frozen tumor tissue specimens ( $n = 4$ ) was performed in technical duplicate with the H3K27Ac antibody used for IHC staining. Protein from a well-characterized patient derived DIPG cell line, SF8628, was analyzed as a positive control, and total extracted Histone H3 protein used as a loading control (A). Densitometry analysis of resulting bands demonstrated higher relative H3K27Ac in tumor samples 1-3, which were given a H3K27Ac IHC score of 3, relative to sample 4, which was assigned a H3K27Ac IHC score of 1 ( $p = 0.0357$ , Mann-Whitney  $U$  test), (B). Band intensity was normalized to total H3, error bar represents standard deviation.
